# Supplementary material for: Molecular Analysis of Targeted Insecticide Resistance Gene Mutations in Field-Caught Mosquitos of Medical Importance From Saudi Arabia
Source: PubMed Central journal article supplement — J Med Entomol. 2021 Apr 17;58(4):1839–48. doi: 10.1093/jme/tjab048 (PMC8285008; doi:10.1093/jme/tjab048), 2021-04-17
Supplement: tjab048_suppl_supplementary_table_1.pdf [file tjab048_suppl_supplementary_table_1.pdf]

Supplemental Table 1. Details of randomly selected samples collected in Jeddah, Saudi Arabia, in 2016 for detection on targeted insecticide resistance gene mutations

| Sample_ID | Species              | Specimen_voucher         | Collection date | Collection site |          |           | GenBank_ID |          |          |
|-----------|----------------------|--------------------------|-----------------|-----------------|----------|-----------|------------|----------|----------|
|           |                      |                          |                 | Location        | Latitude | Longitude | VGSC       |          | Ace-1    |
|           |                      |                          |                 |                 |          |           | DIIS6      | DIIS6    |          |
| Sample1   | <i>Aedes aegypti</i> | SA-JD-AJ-AA-16-2-AK1     | 1-Feb-2016      | Al-Janoub       | 21.24501 | 39.18038  | MN997310   |          | MN997396 |
| Sample2   | <i>Aedes aegypti</i> | SA-JD-AJ-AA-16-2-AK2     | 1-Feb-2016      | Al-Janoub       | 21.24501 | 39.18038  | MN997311   |          |          |
| Sample3   | <i>Aedes aegypti</i> | SA-JD-AA-AA-16-2-AK3     | 1-Feb-2016      | Al-Azeezyia     | 21.54616 | 39.14112  | MN997312   | MN997332 |          |
| Sample4   | <i>Aedes aegypti</i> | SA-JD-AA-AA-16-2-AK4     | 1-Feb-2016      | Al-Azeezyia     | 21.54616 | 39.14112  | MN997313   | MN997333 |          |
| Sample5   | <i>Aedes aegypti</i> | SA-JD-AJ-AR-16-6-AK5     | 1-Jun-2016      | Al-Jameaa       | 21.48650 | 39.26200  | MN997314   | MN997334 |          |
| Sample6   | <i>Aedes aegypti</i> | SA-JD-AJ-AR-16-6-AK6     | 1-Jun-2016      | Al-Jameaa       | 21.48650 | 39.26200  | MN997315   | MN997335 |          |
| Sample7   | <i>Aedes aegypti</i> | SA-JD-AM-AM-16-6-AK7     | 1-Jun-2016      | Al-Matar        | 21.62438 | 39.19302  | MN997316   | MN997336 | MN997397 |
| Sample8   | <i>Aedes aegypti</i> | SA-JD-AM-AM-16-6-AK8     | 1-Jun-2016      | Al-Matar        | 21.62438 | 39.19302  | MN997317   | MN997337 | MN997398 |
| Sample9   | <i>Aedes aegypti</i> | SA-JD-Kh-Gh-16-6-AK9     | 1-Jun-2016      | Khuzam          | 21.27193 | 39.12167  | MN997318   | MN997338 | MN997399 |
| Sample10  | <i>Aedes aegypti</i> | SA-JD-Kh-Gh-16-6-AK10    | 1-Jun-2016      | Khuzam          | 21.27193 | 39.12167  | MN997319   | MN997339 |          |
| Sample11  | <i>Aedes aegypti</i> | SA-JD-Br-AA&AS-16-6-AK11 | 1-Jun-2016      | Breman          | 21.58355 | 39.29436  | MN997320   | MN997340 |          |
| Sample12  | <i>Aedes aegypti</i> | SA-JD-Br-AA&AS-16-6-AK12 | 1-Jun-2016      | Breman          | 21.58355 | 39.29436  | MN997321   | MN997341 |          |
| Sample13  | <i>Aedes aegypti</i> | SA-JD-JA-AS3-16-11-AK13  | 11-Jan-2016     | Aljadeeda       | 21.3554  | 39.06984  | MN997322   | MN997342 |          |
| Sample14  | <i>Aedes aegypti</i> | SA-JD-JA-AS3-16-11-AK14  | 11-Jan-2016     | Aljadeeda       | 21.3554  | 39.06984  | MN997323   | MN997343 |          |
| Sample16  | <i>Aedes aegypti</i> | SA-JD-AJ-AS1-16-1-AK16   | 24-Jan-2016     | Al-Janoub       | 21.24003 | 39.16024  |            | MN997344 | MN997395 |
| Sample17  | <i>Aedes aegypti</i> | SA-JD-AS-BM4-16-2-AK17   | 2-Feb-2016      | Al-Sharafyia    | 21.53352 | 39.23865  |            | MN997345 |          |
| Sample18  | <i>Aedes aegypti</i> | SA-JD-AS-BM4-16-2-AK18   | 2-Feb-2016      | Al-Sharafyia    | 21.53352 | 39.23865  | MN997324   | MN997346 |          |
| Sample19  | <i>Aedes aegypti</i> | SA-JD-Th-Th-16-7-AK19    | 7-Feb-2016      | Thuwal          | 22.29121 | 39.11814  | MN997325   | MN997347 |          |
| Sample20  | <i>Aedes aegypti</i> | SA-JD-Th-Th-16-7-AK20    | 7-Feb-2016      | Thuwal          | 22.29121 | 39.11814  | MN997326   | MN997348 |          |
| Sample21  | <i>Aedes aegypti</i> | SA-JD-AS-AN2-16-8-AK21   | 8-Feb-2016      | Al-Sharafyia    | 21.51801 | 39.22383  | MN997327   | MN997349 |          |
| Sample22  | <i>Aedes aegypti</i> | SA-JD-AS-AN2-16-8-AK22   | 8-Feb-2016      | Al-Sharafyia    | 21.51801 | 39.22383  | MN997328   | MN997350 |          |
| Sample23  | <i>Aedes aegypti</i> | SA-JD-AB-AB-16-2-AK23    | 21-Feb-2016     | Al-Balad        | 21.49716 | 39.18688  | MN997329   | MN997351 |          |
| Sample24  | <i>Aedes aegypti</i> | SA-JD-AB-AB-16-2-AK24    | 21-Feb-2016     | Al-Balad        | 21.49716 | 39.18688  | MN997330   | MN997352 |          |
| Sample25  | <i>Aedes aegypti</i> | SA-JD-AJ-AA-16-2-AK25    | 25-Feb-2016     | Al-Janoub       | 21.25032 | 39.17736  | MN997331   | MN997353 |          |

---

|          |                               |                       |             |           |          |          |          |          |
|----------|-------------------------------|-----------------------|-------------|-----------|----------|----------|----------|----------|
| Sample1  | <i>Culex quinquefasciatus</i> | SA-JD-Th-Th-16-1-CK1  | 12-Jan-2016 | Thuwal    | 22.28892 | 39.11309 | MN997354 | MN997375 |
| Sample2  | <i>Culex quinquefasciatus</i> | SA-JD-AJ-PFN-16-1-CK2 | 6-Jan-2016  | Al-Janoub | 21.26371 | 39.17629 | MN997355 | MN997376 |
| Sample3  | <i>Culex quinquefasciatus</i> | SA-JD-Zh-UN-16-1-CK3  | 6-Jan-2016  | Zhahaban  | 21.77720 | 39.09554 | MN997356 | MN997377 |
| Sample4  | <i>Culex quinquefasciatus</i> | SA-JD-AJ-AA-16-1-CK4  | 16-Jan-2016 | Al-Janoub | 21.23416 | 39.17999 | MN997357 | MN997378 |
| Sample5  | <i>Culex quinquefasciatus</i> | SA-JD-Kh-Pe-16-1-CK5  | 16-Jan-2016 | Khuzam    | 21.45871 | 39.18478 | MN997358 | MN997379 |
| Sample6  | <i>Culex quinquefasciatus</i> | SA-JD-JA-AS-16-1-CK6  | 18-Jan-2016 | Aljadeeda | 21.33795 | 39.06912 | MN997359 | MN997380 |
| Sample7  | <i>Culex quinquefasciatus</i> | SA-JD-AJ-AJ-16-1-CK7  | 31-Jan-2016 | Al-Janoub | 21.26382 | 39.15195 | MN997360 | MN997381 |
| Sample8  | <i>Culex quinquefasciatus</i> | SA-JD-AJ-AM-16-2-CK8  | 2-Feb-2016  | Al-Janoub | 21.26583 | 39.20150 | MN997361 | MN997382 |
| Sample9  | <i>Culex quinquefasciatus</i> | SA-JD-JA-AZ-16-2-CK9  | 7-Feb-2016  | Aljadeeda | 21.36390 | 39.08010 | MN997362 | MN997383 |
| Sample11 | <i>Culex quinquefasciatus</i> | SA-JD-Ta-AS-16-2-CK11 | 29-Feb-2016 | Tayibah   | 21.74690 | 39.18985 | MN997363 | MN997384 |
| Sample14 | <i>Culex quinquefasciatus</i> | SA-JD-AJ-AJ-16-4-CK14 | 4-Apr-2016  | Al-Jameaa | 21.49328 | 39.22153 | MN997364 | MN997385 |
| Sample15 | <i>Culex quinquefasciatus</i> | SA-JD-JA-AS-16-4-CK15 | 7-Apr-2016  | Aljadeeda | 21.34788 | 39.09205 | MN997365 | MN997386 |
| Sample16 | <i>Culex quinquefasciatus</i> | SA-JD-Ub-AS-16-4-CK16 | 19-Apr-2016 | Ubhor     | 21.50462 | 39.26219 | MN997366 | MN997387 |
| Sample17 | <i>Culex quinquefasciatus</i> | SA-JD-Ub-AS-16-4-CK17 | 19-Apr-2016 | Ubhor     | 21.64914 | 39.10834 | MN997367 | MN997388 |
| Sample18 | <i>Culex quinquefasciatus</i> | SA-JD-JA-AK-16-5-CK18 | 15-May-2016 | Aljadeeda | 21.56202 | 39.13797 | MN997368 | MN997389 |
| Sample19 | <i>Culex quinquefasciatus</i> | SA-JD-JA-AK-16-5-CK19 | 15-May-2016 | Aljadeeda | 21.56202 | 39.13797 | MN997369 | MN997390 |
| Sample20 | <i>Culex quinquefasciatus</i> | SA-JD-Ta-AH-16-8-CK20 | 8-May-2016  | Tayibah   | 21.72928 | 39.20415 | MN997370 | MN997391 |
| Sample21 | <i>Culex quinquefasciatus</i> | SA-JD-Ta-AH-16-8-CK21 | 8-May-2016  | Tayibah   | 21.72928 | 39.20415 | MN997371 | MN997392 |
| Sample22 | <i>Culex quinquefasciatus</i> | SA-JD-UA-AR-16-5-CK22 | 19-May-2016 | Um-Assalm | 21.50462 | 39.26219 | MN997372 | MN997393 |
| Sample23 | <i>Culex quinquefasciatus</i> | SA-JD-UA-AN-16-5-CK23 | 19-May-2016 | Um-Assalm | 21.52433 | 39.26179 | MN997373 | MN997394 |
| Sample24 | <i>Culex quinquefasciatus</i> | SA-JD-AJ-AS-16-5-CK24 | 26-May-2016 | Al-Jameaa | 21.50447 | 39.25512 | MN997374 | MN997395 |

---
